# Supplementary material for: Elaboration of a chemical sensor based on polyaniline and sulfanilic acid diazonium salt for highly sensitive detection nitrite ions in acidified aqueous media
Source: Royal Society of Chemistry journal article supplement (doi:10.1039/c8ew00139a), 2018-01-01
Supplement: c8ew00139a2.pdf [file c8ew00139a2.pdf]

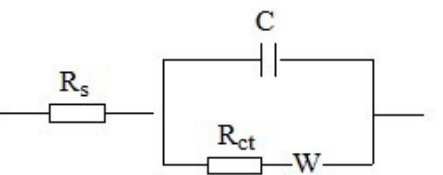

Electrical equivalent circuit for the modeling of the impedance spectra.  $R_s$  is the solution resistance,  $R_{ct}$  the charge transfer resistance,  $C$  the capacitance and  $W$  a Warburg impedance element.
