# Supplementary figures and images for: Elaboration of a chemical sensor based on polyaniline and sulfanilic acid diazonium salt for highly sensitive detection nitrite ions in acidified aqueous media
Source: Royal Society of Chemistry journal article supplement (doi:10.1039/c8ew00139a), 2018-01-01

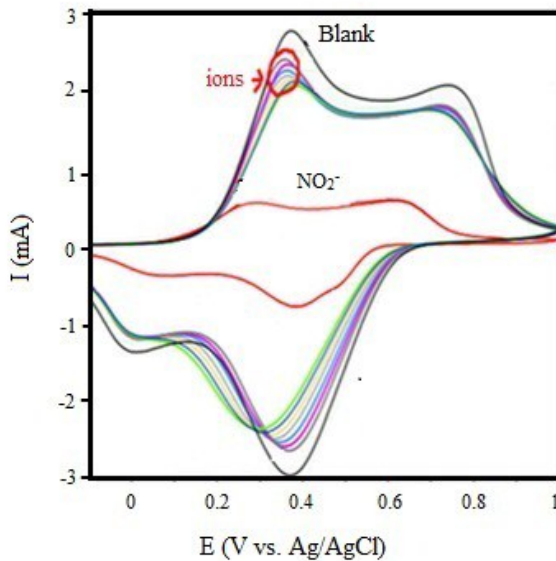

Supplement: c8ew00139a1.pdf [file c8ew00139a1.pdf]
